# Supplementary material for: Open Circuit Solution for Pump Controlled Actuators
Source: MDPI journal article supplement (doi:10.3390/ijms24043700), 2006-01-01
Supplement: s1 [file s1]

## SUPPLEMENTARY MATERIAS

**Supplementary Table S1.** The pairs of mutagenic oligonucleotide primers that were used in the PCR reactions

|         |             |                                               |
|---------|-------------|-----------------------------------------------|
| (K141H) | RPrimer141  | 5'-GAAAAAGTCTTACATAGCCATGGACA-3'              |
| (K141H) | FPrimer141  | 5'-TTGTCCATGGCTATGTAAGACTTTTTC-3'             |
| (S142H) | FPrimer142  | 5'-AAAGTCTTACATCACCATGGACAAGAC-3'             |
| (S142H) | RPrimer142  | 5'-GTCTTGTCCATGGTGATGTAAGACTTT-3'             |
| (E137H) | F1Primer137 | 5'-GAAGGAGATACCCTTATGGCAGAGAAGCCCAAGCTCC-3'   |
| (E137H) | F2Primer137 | 5'-CTTCCCTGCCTTTCATAAAGTCTTACATAGC-3'         |
| (E137H) | R3Primer137 | 5'-GCTATGTAAGACTTTATGAAAGGCAGGGAAG-3'         |
| (E137H) | R4Primer137 | 5'-GTGATGATGACCCTTTTAAAACCTGAAAATCTTCCTTGC-3' |

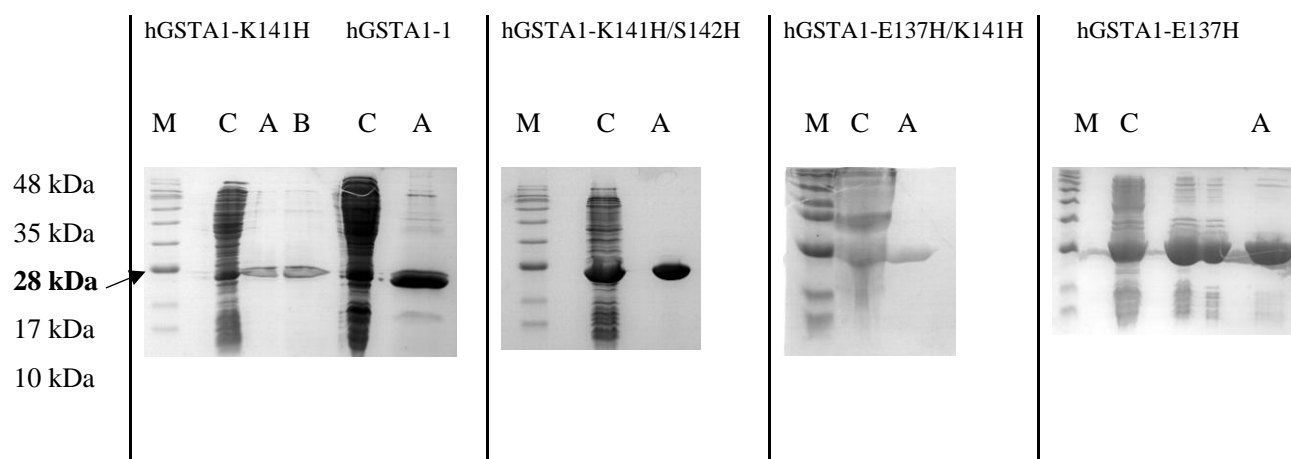

**Supplementary Figure S1.** Analysis of affinity chromatography purified hGSTA1-1 and its mutants by polyacrylamide gel electrophoresis in the presence of SDS (SDS-PAGE). (M) Pre-stained protein marker (Bluestar Prestained Protein Marker, Nippon Genetics Europe), (C) cell crude protein before purification, (A, B) best fractions of purified enzymes that correspond to the band at ~26 kDa. Each sample contained 50  $\mu\text{g}$  of total protein.

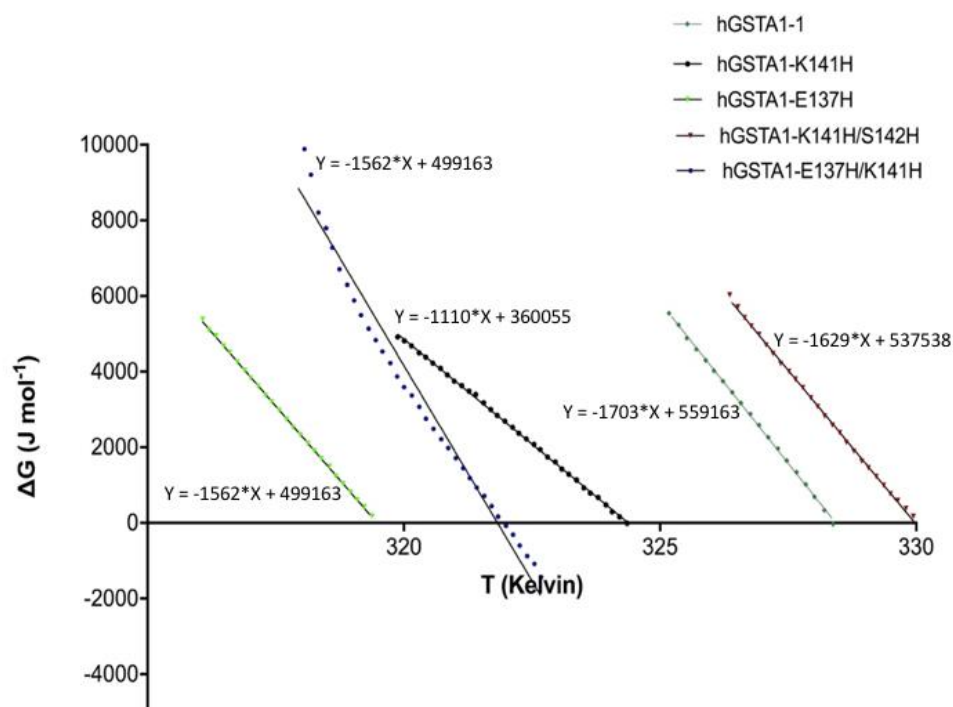

**Supplementary Figure S2.** Plots of calculated  $\Delta uG$  values against temperature values corresponding to 10-50% unfolding. The  $R^2$  value for the linear equations is 0.99 for all

the enzymes except of the hGSTA1-E137H/K141H value that is 0.97. Solving for the linear equation of best fit enables  $\Delta uG^\circ$  to be calculated.
